# Supplementary material for: An Examination of the Application of the Kidney Donor Risk Index in British Columbia
Source: PubMed Central journal article supplement — Can J Kidney Health Dis. 2018 Mar 19;5:2054358118761052. doi: 10.1177/2054358118761052 (PMC5862363; doi:10.1177/2054358118761052), 2018-03-19

Supplementary Table 1: Recipient and transplant characteristics in the Canadian cohort and the U.S. KDRI derivation cohort

| <b>Recipient Factors</b>                                                              |                                  |                                |                |
|---------------------------------------------------------------------------------------|----------------------------------|--------------------------------|----------------|
|                                                                                       | <b>Canadian Cohort<br/>N=785</b> | <b>U.S. Cohort<br/>N=68219</b> | <b>P-Value</b> |
| Median Age years (Q1,Q3)                                                              | 55 (45, 63)                      | 51 (41, 60)                    |                |
| Female Sex %                                                                          | 37                               | 39                             | 0.255          |
| Race %                                                                                |                                  |                                |                |
| White                                                                                 | 53                               | 63                             | <0.001         |
| Black                                                                                 | 1                                | 30                             |                |
| Asian                                                                                 | 31                               | 5                              |                |
| Other                                                                                 | 5                                | 2                              |                |
| Diabetes as cause of ESRD %                                                           | 19                               | 24                             | <0.001         |
| Body Mass Index (kg/m <sup>2</sup> ) %                                                |                                  |                                |                |
| <25                                                                                   | 49                               | 38                             | <0.001         |
| 25-29.9                                                                               | 30                               | 35                             |                |
| 30-34.9                                                                               | 15                               | 19                             |                |
| ≥ 35                                                                                  | 6                                | 8                              |                |
| Peak PRA (%)                                                                          |                                  |                                |                |
| 0                                                                                     | 53                               | 44                             | <0.001         |
| 0.1-30                                                                                | 32                               | 41                             |                |
| >30                                                                                   | 15                               | 9                              |                |
| Years of pre-transplant dialysis exposure<br>Median (Q1, Q3)                          | 5.0 (3.2, 6.8)                   | 2.8 (1.5, 4.4)                 | <0.001         |
| <b>Transplant Factors</b>                                                             |                                  |                                |                |
| Year of Transplantation %                                                             |                                  |                                |                |
| 1995-1999                                                                             | --                               | 41                             | N/A            |
| 2000-2004                                                                             | --                               | 48                             |                |
| 2005-2009                                                                             | 37                               | 11                             |                |
| 2010-2014                                                                             | 63                               | --                             |                |
| ABDR HLA mismatch (%)                                                                 |                                  |                                |                |
| 0-2                                                                                   | 8                                | 25                             | <0.001         |
| 3-4                                                                                   | 48                               | 43                             |                |
| 5-6                                                                                   | 44                               | 32                             |                |
| Median Cold Ischemia Time, hours (Q1,Q3)                                              | 10.4 (7.4, 14.0)                 | 19.0 (13.6, 24.5)              | <0.001         |
| Missing Data Canada: HLA mismatch (2.8%); PRA (19%) U.S. HLA mismatch(0.5%); PRA:0.6% |                                  |                                |                |

**Supplementary Figure 1**

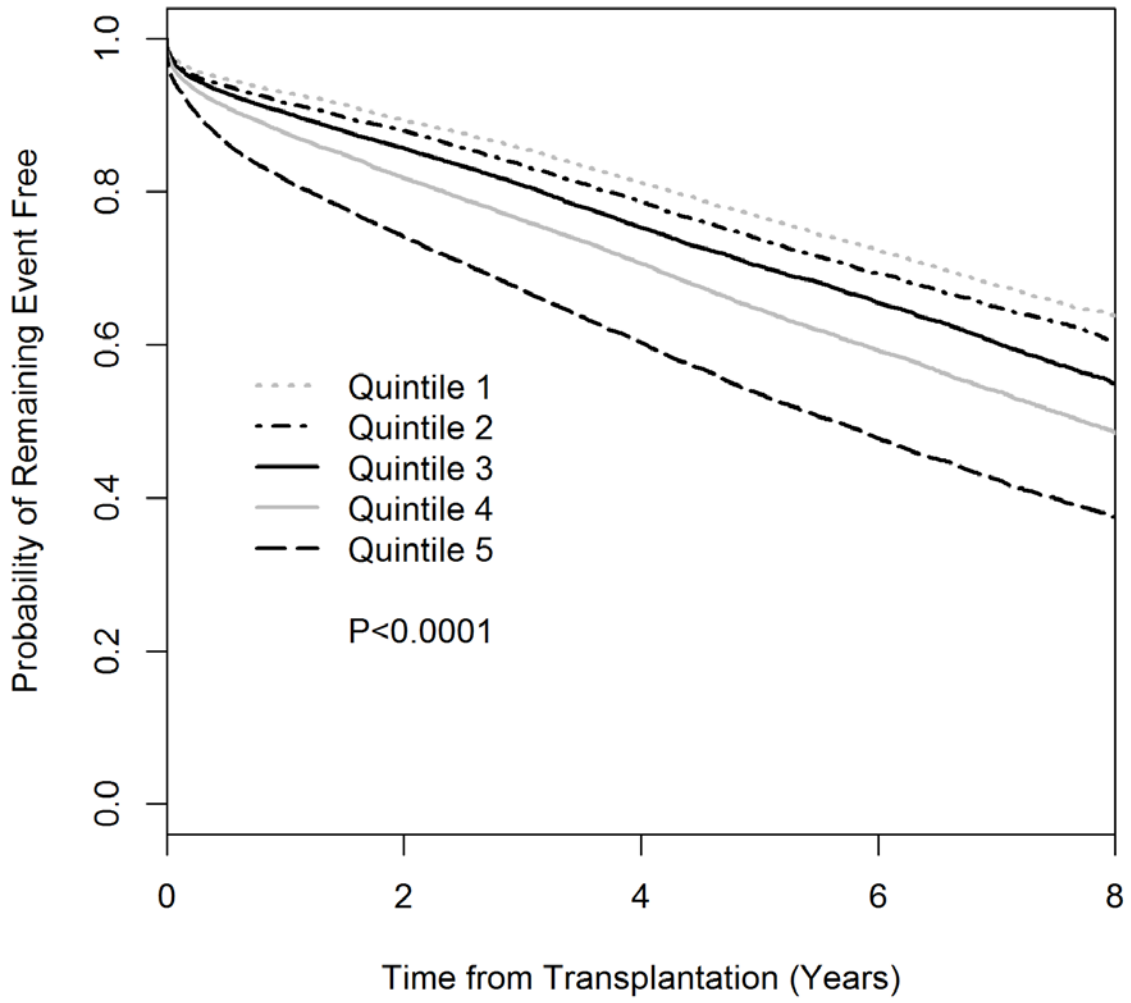

Supplement: Supplemental_Material.pdf [file Supplemental_Material.pdf]
